# Supplementary material
Source: PubMed Central journal article supplement (PMC8504922)
Supplement: mmc1.pdf [file mmc1.pdf]

# THE LANCET Microbe

## Supplementary appendix

This appendix formed part of the original submission. We post it as supplied by the authors.

Supplement to: Saiag E, Goldshmidt H, Sprecher E, Ben-Ami R, Bomze D. Immunogenicity of a BNT162b2 vaccine booster in health-care workers. *Lancet Microbe* 2021; published online Oct 11. S2666-5247(21)00272-X.

## APPENDIX

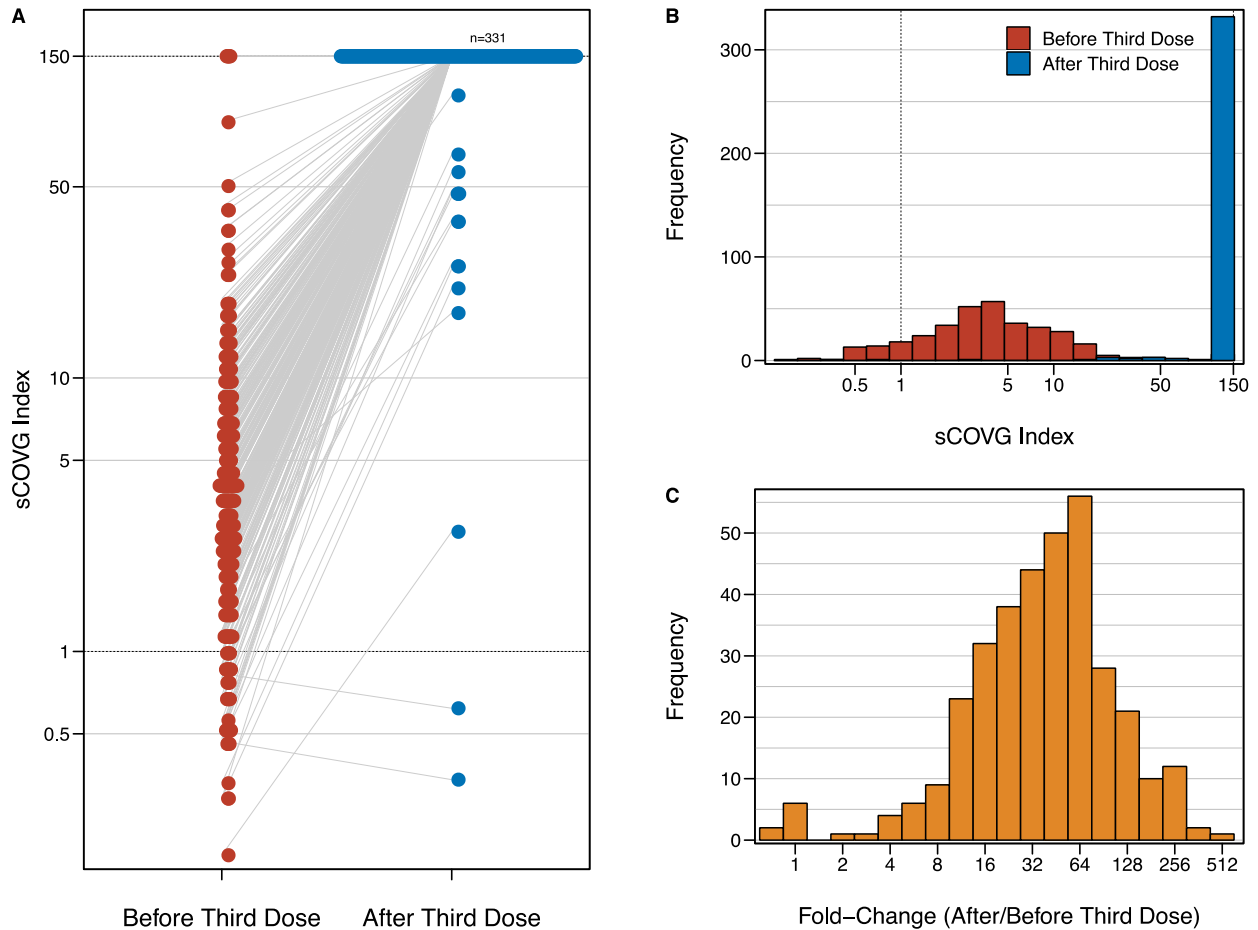

### Immunogenicity of a third dose of BNT162b2 vaccine in healthcare workers

(A) Antibody levels before and after the third dose, measured using a serology assay, which reports a value (sCOVG index) up to 150, where an index  $\geq 1.00$  is considered positive for SARS-CoV-2 antibodies. Each dot represents one individual. Antibody levels increased to  $>150$  (the upper limit of quantification) in 331 (95.7%) cases. A conversion factor between sCOVG index and the WHO 20/136 International Standard binding antibody units (BAU)/mL has been established as:  $(\text{sCOVG index}) \times 21.8 = 1 \text{ BAU/mL}$ . (B) Histogram of the distribution of antibody levels before and after the third dose. (C) Histogram of the distribution of the fold-change in antibody levels following the third dose.
